# Supplementary material
Source: HighWire-hosted journal article supplement (https://wjps.bmj.com/content/6/3/e000534)
Supplement: inline-supplementary-material-1 [file inline-supplementary-material-1.pdf]

## Appendix

Appendix 1: Full survey instrument

**Apêndice 1: Instrumento de Pesquisa Completo**

**Appendix 1: Full Survey Instrument**

### POPULAÇÃO DE PACIENTES/ PATIENT POPULATION

**Você opera crianças? (1 - 14 anos de idade)**

Do you operate on children? (1 - 14 years old)

**Você opera bebês? (< 1 ano de idade)**

Do you operate on babies? (<1 year of age)

**Você opera adultos? (> 14 anos de idade)**

Do you operate on adults? (> 14 years old)

### DISTRIBUIÇÃO DE TEMPO/ TIME DISTRIBUTION

**Qual é aproximadamente a porcentagem de cirurgias que você realiza em crianças? (1 - 14 anos de idade) (1-20%, 21-40%, 41-60%, 61-80%, 81-99%)**

About what percentage of the surgeries you perform are on children? (1 - 14 years old)

**Qual é aproximadamente a porcentagem de cirurgias que você realiza em bebês? (< 1 ano de idade) (1-20%, 21-40%, 41-60%, 61-80%, 81-99%)**

About what percentage of the surgeries you perform are on babies? (<1 year of age)

**Qual é aproximadamente a porcentagem de cirurgias que você realiza em adultos? (> 14 anos de idade) (1-20%, 21-40%, 41-60%, 61-80%, 81-99%)**

About what percentage of the surgeries you perform are on adults? (> 14 years old)

**Qual a porcentagem de tempo que você passa, realizando assistência? (diretamente cuidando de pacientes, relatórios de transferência e evolução médica no prontuário) (0%, 1-20%, 21-40%, 41-60%, 61-80%, 81-99%, 100%)**

What percentage of your time do you spend performing clinical activities? (directly taking care of patients, referral notes, charting)

**Qual a porcentagem de tempo que você passa, realizando atividades administrativas? (atividades em seu hospital, clínica ou faculdade) (0%, 1-20%, 21-40%, 41-60%, 61-80%, 81-99%, 100%)**

What percentage of your time do you spend performing administrative activities? (serving in nonclinical, operations at your hospital, clinic or university)

**Qual a porcentagem de tempo que você passa com atividades acadêmicas? (ensinando estudantes em situações não assistenciais, como aulas teóricas) (0%, 1-20%, 21-40%, 41-60%, 61-80%, 81-99%, 100%)**

What percentage of your time is spent performing teaching activities? (Teaching students in non-clinical situations, ie. lectures)

**Qual a porcentagem de tempo que você passa, realizando pesquisa? (conduzindo e realizando qualquer tipo de pesquisa)(0%, 1-20%, 21-40%, 41-60%, 61-80%, 81-99%, 100%)**

What percentage of your time is spent performing research activities? (conducting, performing and implementing any type of research)

#### **PROCEDIMENTOS PEDIÁTRICOS/ PEDIATRIC PROCEDURES**

**Aproximadamente, quantas cirurgias/procedimentos necessitando anestesia geral, você realizou no último ano?**

How many surgeries/procedures requiring general anesthesia, did you perform last year?

**Das operações necessitando anestesia geral, no último ano, quantas foram realizadas em pacientes menores de 1 ano?**

Operations requiring general anesthesia, how many were performed in patients under 1 year?

**Das operações necessitando anestesia geral, no último ano, quantas foram realizadas em pacientes entre 1 e 14 anos?**

Operations requiring general anesthesia, how many were performed in patients between 1 and 14 years?

**No ano passado, sobre quantos dos seguintes ingressantes pediátricos especializados Procedimentos que você realizou? (Use numerais para indicar uma resposta inteira Para o número de operações deste tipo realizado no ano passado (por exemplo: 0, 32, 987).**

Over the past year, about how many of the following specialized pediatric congenital procedures did you perform? (Please use numerals to indicate an integer answer for the number of operations of this type performed in the last year (for example: 0, 32, 987).

Anomalias anorretais

Anorectal Anomalies

Doença de Hirschsprung

Hirschsprung Disease

Atresia de esôfago

Esophageal atresia

Gastrosquise

Gastroschisis

Onfalocele

|                      |
|----------------------|
| Omphalocele          |
| Hérnia Diafragmática |
| Diaphragmatic hernia |
| Extrofia de Bexiga   |
| Bladder extrophy     |

**Por favor selecione todas as condições do DCP3 que você opera ou realiza.**  
**(Escolhas=**  
**Abordagem de via aérea, reposição volêmica, controle de sangramento (trauma), prescrição de antibióticos**  
**Transusão de sangue**  
**Tubo traqueal (traqueotomia)**  
**Anestesia local**  
**Anestesia espinhal e geral**  
**Hérnia Pediátrica**  
**Hérnia Pediátrica (infantil)**  
**Hérnia umbilical**  
**Estenose pilórica**  
**Colostomia**  
**Obstrução intestinal neonatal (atresia, estenose, má rotação)**  
**Correção de fístula traqueoesofágica**  
**Pé torto**  
**Lábio leporino**  
**Malformações anorretais ou doença de Hirschsprung (primeiro estágio; muitas vezes colostomia)**  
**Malformações anorretais ou doença de Hirschsprung (tratamento definitivo)**  
**Defeitos da parede abdominal**  
**Hidrocefalia**  
**Anomalias cardíacas congênitas**  
**Espinha bífida**  
**Extrofia da bexiga**  
**Testículos que não desceram**  
**Hipospádia**  
**(Escolha todas que se aplicam)**

Please select all DCP3 conditions you operate or perform.  
(Choices =  
airway approach, volume/fluid replacement, bleeding control (trauma), antibiotic therapy)  
Blood transfusion  
Tracheal tube (tracheotomy)  
Local anesthesia  
Spinal and general anesthesia  
Pediatric hernia  
Pediatric hernia (infant)  
Umbilical hernia  
Pyloric stenosis  
Colostomy  
Neonatal bowel obstruction (atresia, stenosis, malrotation)  
Tracheoesophageal fistula repair  
Clubfoot  
Cleft lip  
Anorectal malformations or Hirschsprung's disease (first stage; often colostomy)  
Anorectal malformations or Hirschsprung's disease (definitive treatment)  
Abdominal wall defects  
Hydrocephalus  
Congenital cardiac anomalies  
Spina bifida  
Bladder exstrophy  
Undescended testicles  
Hypospadias  
(Choose all that apply)

#### **BARREIRAS AO CUIDADO CIRÚRGICO PEDIÁTRICO/ BARRIERS TO PEDIATRIC SURGICAL CARE**

**Qual(is) da(s) seguinte(s) barreira(s), você enfrenta para fornecer cuidados em cirurgia pediátrica adequados a seus pacientes?**

**(Escolhas=**

**Falta de anestesia**

**Falta de equipamento cirúrgico**

**Falta de acesso a uma sala de cirurgia**

**Falta de medicamentos**

**Falta de infraestrutura (eletricidade, água, sucção)**

**Falta de espaço na enfermaria de recuperação**

**Falta de reembolso/pagamento**

**Falta de treinamento mais especializado**

**Falta de mecanismo de referência**

**Fatores do paciente (geografia, finanças, sociais, etc)**

**Sem barreiras**

**Outro, por favor, especifique)**

Which of the following barrier (s), do you face to provide care in pediatric surgery appropriate to your patients?

(Choices =

- Lack of anesthesia provider
- Lack of surgical equipment
- Lack of access to an operating room
- Lack of medications
- Lack of infrastructure (electricity, water, suction)
- Lack of recovery ward space
- Lack of reimbursement/payment
- Lack of more specialized training
- Lack of referral mechanism
- Patient factors (geography, finances, social, etc)
- No barriers
- Other, please specify)

**Por favor, liste outras barreiras que dificultam o seu trabalho.**

Please list other barriers that make your work difficult.

**Você possui acesso em tempo integral dos seguintes serviços, no principal hospital que você trabalha?**

**(Escolhas=**

- Unidade intensiva neonatal**
- Terapia Intensiva Pediátrica**
- Nutrição Parenteral Neonatal**
- Ventilador oscilante neonatal**
- Anestesiologista Pediátrico**
- (Escolha todas que se aplicam))**

Do you have full time access to the following services in the main hospital you work with?

(Choices =

- Neonatal intensive care unit
- Pediatric intensive care
- Neonatal parenteral nutrition
- Neonatal oscillating ventilator
- Pediatric anesthesiologist
- (Choose all that apply)

#### **CARACTERÍSTICAS DO FORNECEDOR/ PROVIDER CHARACTERISTICS**

**Por quantos anos você tem praticado cirurgia desde o término de sua residência ou programa de especialização?**

How many years have you been practicing surgery since the end of your residence or specialization program?

**Você realizou algum programa de treinamento em cirurgia pediátrica? (Marque todas que aplicar)**

**(Escolhas=**

**Residência**

**Especialização**

**Estágio em Serviço de Cirurgia Pediátrica**

**(Marque todas que aplicar))**

Did you complete a training program in pediatric surgery?

(Choice =

Residency

Specialization

Pediatric Surgery Observership

(Mark all to apply)

**Você está registrado no Conselho Regional de Medicina como cirurgião pediátrico?**

Are you registered with the Regional Council of Medicine as a pediatric surgeon?

**Você possui algum título de pós-graduação, além da residência? (Marque todas que aplicar) (Escolhas=**

**Mestres**

**Doutorado**

**Pós-Doc**

**Professor Titular**

**Outro**

**Não tenho título de pós-graduação**

**(Escolha todas que se aplicam))**

Do you have a postgraduate title besides the residence? (Mark all to apply)

(Choices =

Masters

PhD

Post Doc

Full Professor

Other

I do not have a post-graduation title

(Choose all that apply))

**Em qual desses estabelecimentos você trabalha? (Marque todas que aplicar)**

**(Escolhas=**

**SUS (Hospital escola)**

**SUS (Hospital Não Escolar)**

**Privado (hospital de ensino)**

**Privado (hospital não-escola)**

**Fundação (Hospital de Ensino)**

**Fundação (hospital não-escola)**

**(Escolha todas que se aplicam))**

In which of these practice settings do you work ? (Mark all to apply)

(Choice =

SUS (Teaching Hospital)

SUS (Non teaching hospital)

Private (Teaching hospital)

Private (Non teaching hospital)

Foundation (Teaching hospital)

Foundation (Non teaching hospital)

(Choose all that apply))

**Em qual dos estabelecimentos, você passa a maior parte do seu tempo?**

(Escolha um=

**SUS (Hospital escola)**

**SUS (Hospital Não Escolar)**

**Privado (hospital de ensino)**

**Privado (hospital não-escola)**

**Fundação (Hospital de Ensino)**

**Fundação (hospital não-escola))**

In which practice setting do you spend the majority of your time?

(Choose one =

SUS (Teaching Hospital)

SUS (Non teaching hospital)

Private (Teaching hospital)

Private (Non teaching hospital)

Foundation (Teaching hospital)

Foundation (Non teaching hospital)

**Em qual região você trabalha? (Marque todas que aplicar)**

(Escolhas=

**Norte**

**Nordeste**

**Centro-Oeste**

**Sudeste**

**Sul**

**(Escolha todas que se aplicam))**

In which region do you work? (Mark all to apply)

(Choice =

North

Northeast

Center-West

Southeast

South

(Choose all that apply))

**Em qual(is) estado(s) você trabalha? (Marque todas que aplicar)**  
(Escolha=  
Acre  
Amapá  
Amazonas  
Pára  
Rondônia  
Roraima  
Tocantins  
Alagoas  
Bahia  
Ceará  
Maranhão  
Paraíba  
Pernambuco  
Piauí  
Rio Grande do Norte  
Sergipe  
Goiás  
Mato Grosso  
Mato Grosso do Sul  
Distrito Federal  
Espírito Santo  
Minas Gerais  
Rio de Janeiro  
São Paulo  
Paraná  
Rio Grande do Sul  
Santa Catarina  
(Escolha todas que se aplicam))



In which state (s) do you work? (Mark all to apply)

(Choice =

Acre

Amapá

Amazonas

Pará

Rondônia

Roraima

Tocantins

Alagoas

Bahia

Ceará

Maranhão

Paraíba

Pernambuco

Piauí

Rio Grande do Norte

Sergipe

Goiás

Mato Grosso

Mato Grosso do Sul

Distrito Federal

Espírito Santo

Minas Gerais

Rio de Janeiro

São Paulo

Paraná

Rio Grande do Sul

Santa Catarina

(Choose all that apply))

**Em quantos hospitais você trabalha? (incluindo inclusive hospitais em que você não realiza cirurgias, mas realiza ambulatório ou evolui pacientes).**

How many hospitals do you work on? (including hospitals where you do not perform surgeries, but might have an outpatient clinic, consults, or take care of patients).

#### **HOSPITAL CHARACTERISTICS/ CARACTERÍSTICAS DO HOSPITAIS**

**Os níveis de hospitais a seguir foram criados pelo Banco Mundial e pelo 'Global Initiative for Children's Surgery' para padronizar os tipos de hospitais aonde serviços de cirurgias são realizados. Como você descreveria o hospital aonde você realiza a maioria de suas cirurgias pediátricas? Escolhas=**

|                                                                                                                                                                                                                                                                                                               |                                                                                                           |                                                                                                                                                                                                                                                                              |                                                                                                                                                                                                                                                                                                                                                                                                                                                                                                                                                 |
|---------------------------------------------------------------------------------------------------------------------------------------------------------------------------------------------------------------------------------------------------------------------------------------------------------------|-----------------------------------------------------------------------------------------------------------|------------------------------------------------------------------------------------------------------------------------------------------------------------------------------------------------------------------------------------------------------------------------------|-------------------------------------------------------------------------------------------------------------------------------------------------------------------------------------------------------------------------------------------------------------------------------------------------------------------------------------------------------------------------------------------------------------------------------------------------------------------------------------------------------------------------------------------------|
| <p><b>Hospital Primário</b> ( poucas especialidades, sobretudo clínicas, ginecologia e obstetrícia, pediatria e cirurgia geral. Pode haver apenas um clínico geral ou outro profissional de saúde. Laboratórios limitados para análise gerais, não há serviço de patologia especializado; 50-250 leitos).</p> | <p><b>Hospital Secundário</b>(mais especializado, com 5 a 10 especialidades médicas, 200-800 leitos).</p> | <p><b>Hospital Terciário</b>(equipe avançada, com equipamentos para serviços de cardiologia, centro de terapia intensiva e unidade de imagem por exemplo. Serviços altamente especializados, Atividades acadêmicas em alguns estabelecimentos; 300-1500 leitos ou mais).</p> | <p><b>Hospital Nacional de Crianças</b> (Cuidados cirúrgicos pediátrico abrangente, especialmente com um time multidisciplinar e que conta com apoio ao doente crônico. Especialistas em todas as áreas, que possuem habilidades avançadas em cirurgia e anestesia. Educação, treinamento de profissionais e pesquisa em todas as especialidades pediátricas. Possui enfermarias pediátricas, ambulatórios e salas de cirurgias. Leitos intensivos neonatais, pediátricos e unidade de queimados. Desenvolvimento de padrões de tratamento)</p> |
|---------------------------------------------------------------------------------------------------------------------------------------------------------------------------------------------------------------------------------------------------------------------------------------------------------------|-----------------------------------------------------------------------------------------------------------|------------------------------------------------------------------------------------------------------------------------------------------------------------------------------------------------------------------------------------------------------------------------------|-------------------------------------------------------------------------------------------------------------------------------------------------------------------------------------------------------------------------------------------------------------------------------------------------------------------------------------------------------------------------------------------------------------------------------------------------------------------------------------------------------------------------------------------------|

The following levels of hospitals were created by the World Bank and the 'Global Initiative for Children's Surgery' to standardize hospitals where surgery services are performed. How would you describe the hospital where do you perform most of your pediatric surgeries?

|                                                                                                                                                                                                                                                                                                                 |                                                                                                        |                                                                                                                                                                                                                                              |                                                                                                                                                                                                                                                                                                                                                                                                                                                                                   |
|-----------------------------------------------------------------------------------------------------------------------------------------------------------------------------------------------------------------------------------------------------------------------------------------------------------------|--------------------------------------------------------------------------------------------------------|----------------------------------------------------------------------------------------------------------------------------------------------------------------------------------------------------------------------------------------------|-----------------------------------------------------------------------------------------------------------------------------------------------------------------------------------------------------------------------------------------------------------------------------------------------------------------------------------------------------------------------------------------------------------------------------------------------------------------------------------|
| <p><b>First-level Hospital</b> (few specialties, especially clinical, gynecology and obstetrics, pediatrics and general surgery. There may only be a general practitioner or other health professional. Limited laboratories for general analysis, there is no specialized pathology service; 50-250 beds).</p> | <p><b>Second-level Hospital</b>(more specialized, with 5 to 10 medical specialties, 200-800 beds).</p> | <p><b>Third-level Hospital</b>(advanced team, with equipment for cardiology services, intensive care center and image unit for example. Highly specialized services, academic activities in some establishments; 300-1500 beds or more).</p> | <p><b>National Children's Hospital</b> (Comprehensive Pediatric Surgical Care, especially with a multidisciplinary team that has support for the chronic patient. Specialists in all areas, who have advanced skills in surgery and anesthesia. Education, training of professionals and research in all specialties Pediatric. It has pediatric wards, outpatient clinics and rooms. Neonatal, pediatric intensive beds and burning unit. Development of treatment patterns)</p> |
|-----------------------------------------------------------------------------------------------------------------------------------------------------------------------------------------------------------------------------------------------------------------------------------------------------------------|--------------------------------------------------------------------------------------------------------|----------------------------------------------------------------------------------------------------------------------------------------------------------------------------------------------------------------------------------------------|-----------------------------------------------------------------------------------------------------------------------------------------------------------------------------------------------------------------------------------------------------------------------------------------------------------------------------------------------------------------------------------------------------------------------------------------------------------------------------------|
